# Supplementary material for: Mechanism for the lethal effect of enterovirus A71 intracerebral injection in neonatal mice
Source: PubMed Central journal article supplement (PMC7096333; doi:10.1038/s41374-019-0351-5), 2019-12-19
Supplement: 41374_2019_351_MOESM1_ESM.pdf [file 41374_2019_351_MOESM1_ESM.pdf]

## Supplementary

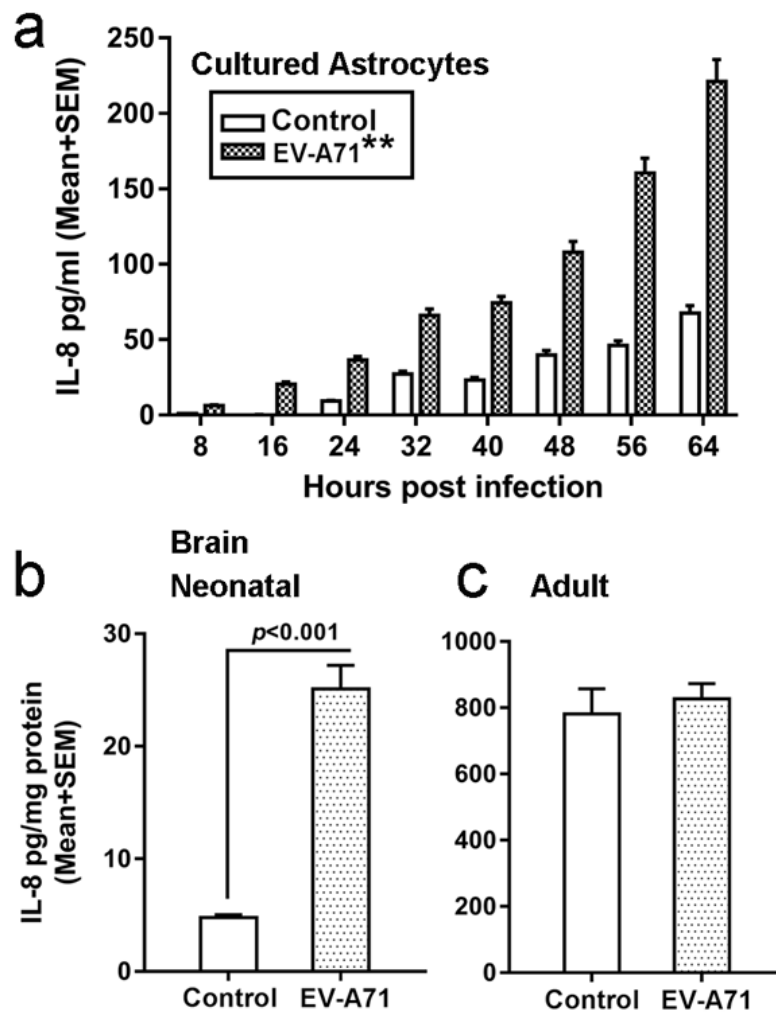

**S1.** Detection of IL-8 in astrocytes *in vitro* and in the brains of mice with EV-A71 infection *in vivo*. IL-8 released by astrocytes from 8 to 64 hours post EV-A71 infection (a). IL-8 detected in brainstem homogenates from neonatal (b) and adult (c) mice 4 days post infection. \*\* $p \leq 0.01$  in comparison with the corresponding control group.
